# Supplementary material for: Morphological and mechanical properties of biodegradable poly(glycolic acid)/poly(butylene adipate-co-terephthalate) blends with in situ compatibilization
Source: Royal Society of Chemistry journal article supplement (doi:10.1039/d0ra08813g), 2021-01-01
Supplement: d0ra08813g1.pdf [file d0ra08813g1.pdf]

# Morphological and Mechanical Properties of Biodegradable Poly(glycolic acid) /Poly(butylene adipate-co-terephthalate) Blends with In-situ Compatibilization

Rong Wang\*, Xiaojie Sun, Lanlan Chen, Wenbin Liang  
National Institute of Clean and Low-Carbon Energy, Beijing, 102211, China  
\* Corresponding author. Email address: [rong.wang.cv@chnenergy.com.cn](mailto:rong.wang.cv@chnenergy.com.cn)

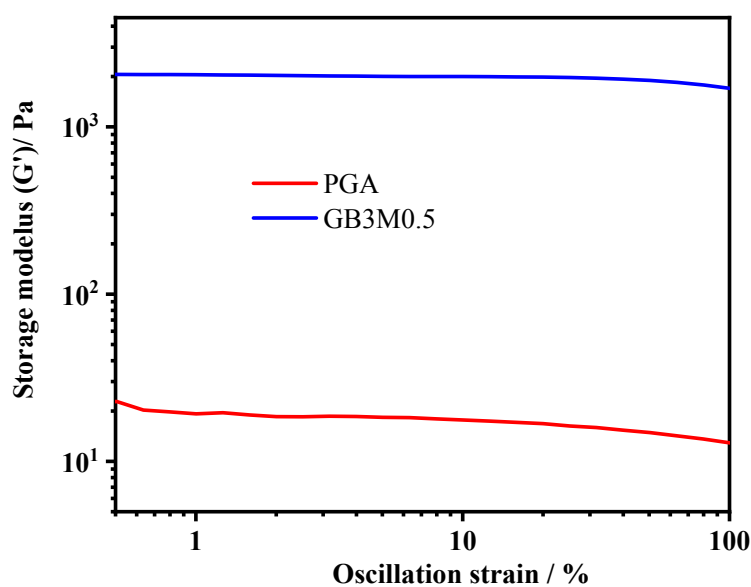

Figure S1. Strain dependence of storage modulus ( $G'$ ) of the blends

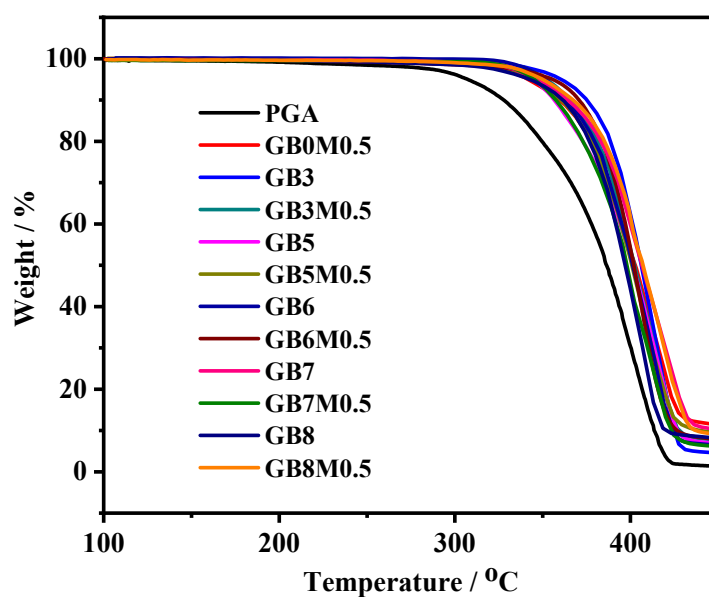

Figure S2. TGA curves of the blends

Table S1 Mechanical properties of the blends

| Sample  | Flexural modulus /<br>GPa | Tensile strength /<br>MPa |
|---------|---------------------------|---------------------------|
| PGA     | $6.92 \pm 0.10$           | $111.1 \pm 3.2$           |
| GB0M0.5 | $6.66 \pm 0.09$           | $97.3 \pm 2.7$            |
| GB3M0.5 | $3.40 \pm 0.06$           | $58.3 \pm 1.6$            |
| GB5M0.5 | $1.55 \pm 0.03$           | $51.4 \pm 1.5$            |
| GB6M0.5 | $0.75 \pm 0.02$           | $36.3 \pm 1.3$            |
| GB7M0.5 | $0.69 \pm 0.02$           | $34.6 \pm 1.4$            |
| GB8M0.5 | $0.24 \pm 0.01$           | $28.4 \pm 1.0$            |
